# Supplementary material for: Amyloid Aggregates of Smooth-Muscle Titin Impair Cell Adhesion
Source: MDPI journal article supplement (doi:10.3390/ijms22094579), 2021-04-27
Supplement: s1 [file s1]

## Supplementing Materials

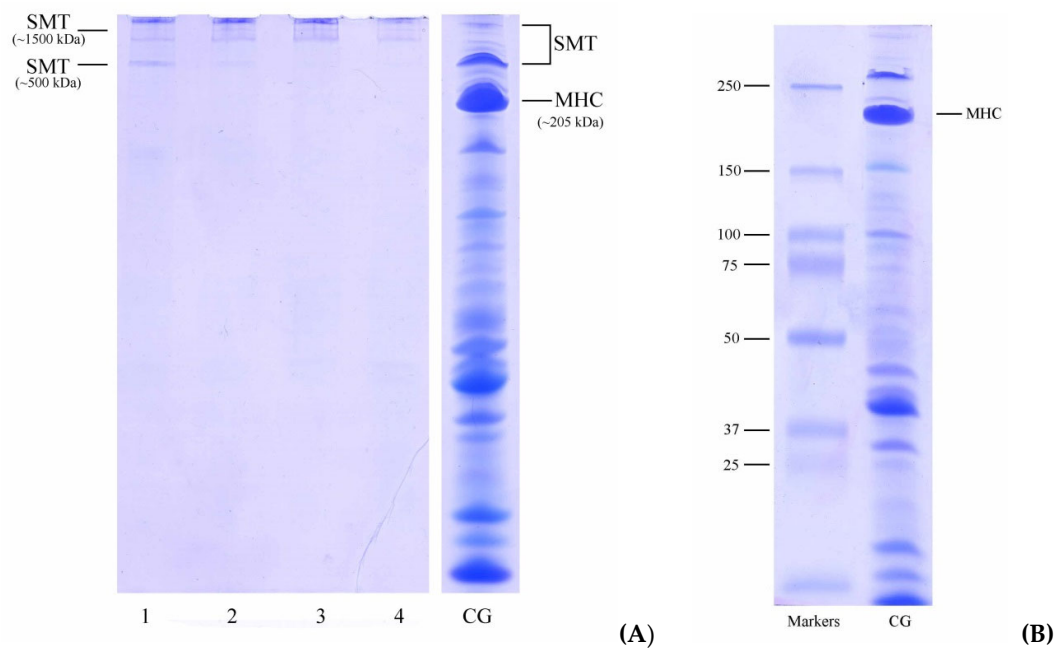

**Supplementary Fig. S1.** (A) SDS-PAGE of purified SMT (lanes 1–4). Chicken gizzard was used as a control (right-hand lane). (B) Protein markers of molecular weights within the range of 10–250 kDa were also used (left-hand lane). MHC, myosin heavy chains; CG, chicken gizzard, SMT, smooth muscle titin.

**Supplementary Table S1. The list of detected titin peptides**

| Sequence                             | Mass      | Proteins | Start position | Gene names | Unique (Proteins) | Charges | Score  | Intensity | MS/MS Count |
|--------------------------------------|-----------|----------|----------------|------------|-------------------|---------|--------|-----------|-------------|
| EPGHLEESYAQQTTLEYGYK                 | 2342.0703 | Q8WZ42   | 719            | TTN        | yes               | 3       | 96.447 | 5562000   | 1           |
| IDSTVSQDSAUYTATAINK                  | 2069.9906 | Q8WZ42   | 1617           | TTN        | yes               | 2;3     | 69.602 | 5750400   | 2           |
| AINIAGETSSHAFLLVQAK                  | 1969.0633 | Q8WZ42   | 2153           | TTN        | yes               | 3       | 79.013 | 12857000  | 3           |
| EPATITEEAVSIDVTQGDPA TLQVK           | 2611.3229 | Q8WZ42   | 5504           | TTN        | yes               | 3       | 53.266 | 10740000  | 2           |
| ADNSVGAVASSAVLVIK                    | 1599.8832 | Q8WZ42   | 8021           | TTN        | yes               | 2       | 62.891 | 2878200   | 1           |
| PVSVDLALGESGTFK                      | 1518.793  | Q8WZ42   | 8145           | TTN        | yes               | 2       | 133.05 | 4020000   | 1           |
| MTLVENTATLTVLK                       | 1532.8484 | Q8WZ42   | 8187           | TTN        | yes               | 2       | 116.55 | 2474100   | 1           |
| DNDVFEIDIK                           | 1277.6139 | Q8WZ42   | 9597           | TTN        | yes               | 2       | 85.355 | 3024200   | 1           |
| MFFASHTEEVSVTVPEVQK                  | 2293.0936 | Q8WZ42   | 10174          | TTN        | yes               | 3       | 61.102 | 3315400   | 1           |
| LDQAGEVLYQALNAITTA I LTVK            | 2444.3526 | Q8WZ42   | 12387          | TTN        | yes               | 3       | 74.876 | 44910000  | 3           |
| HILVINDSQFDDEGVYTA E VEGK            | 2577.2235 | Q8WZ42   | 12466          | TTN        | yes               | 3       | 64.295 | 2515200   | 1           |
| ESAVFTVELSHDNIR                      | 1715.8479 | Q8WZ42   | 12871          | TTN        | yes               | 3       | 85.457 | 3173700   | 1           |
| NLANIEVSETDTIK                       | 1545.7886 | Q8WZ42   | 13395          | TTN        | yes               | 2       | 150.46 | 4860000   | 1           |
| TISGEIDVNV IAR                       | 1385.7514 | Q8WZ42   | 14402          | TTN        | yes               | 2       | 127.76 | 9556300   | 2           |
| VTDVIEGTEVQFQVR                      | 1718.8839 | Q8WZ42   | 15172          | TTN        | yes               | 2       | 147.91 | 5780100   | 2           |
| VSAVNAAGEGPPGETQPVTVAEPQEPPAVELDVSVK | 3567.7944 | Q8WZ42   | 16003          | TTN        | yes               | 3       | 23.059 | 2946300   | 1           |
| GYIVEMQEEGT TDWK                     | 1784.7927 | Q8WZ42   | 16665          | TTN        | yes               | 2       | 84.479 | 3066200   | 1           |
| EFMEVEEGTNVNIVAK                     | 1807.8662 | Q8WZ42   | 17051          | TTN        | yes               | 2       | 184.24 | 3545600   | 1           |
| TDEHYTVETDNFSSVLT IK                 | 2198.0379 | Q8WZ42   | 18480          | TTN        | yes               | 3       | 97.284 | 4356400   | 1           |
| NIVGEVGDVITIQVHDIPGPPTGPIK           | 2664.4487 | Q8WZ42   | 22069          | TTN        | yes               | 3       | 72.881 | 0         | 1           |
| VTGLTEGNEYEFH VMAENAAGVGPASGISR      | 3062.4404 | Q8WZ42   | 29141          | TTN        | yes               | 3       | 48.422 | 45431000  | 3           |
| AMIATSETHTELVIK                      | 1642.86   | Q8WZ42   | 31108          | TTN        | yes               | 3       | 56.482 | 4227900   | 1           |
| FGVTITVHPEPHVTWYK                    | 2010.0363 | Q8WZ42   | 32636          | TTN        | yes               | 3       | 99.451 | 10930000  | 2           |
| STFEISSVQASDEGNYSVVVENSEGK           | 2761.2566 | Q8WZ42   | 33543          | TTN        | yes               | 3       | 136.4  | 73879000  | 6           |

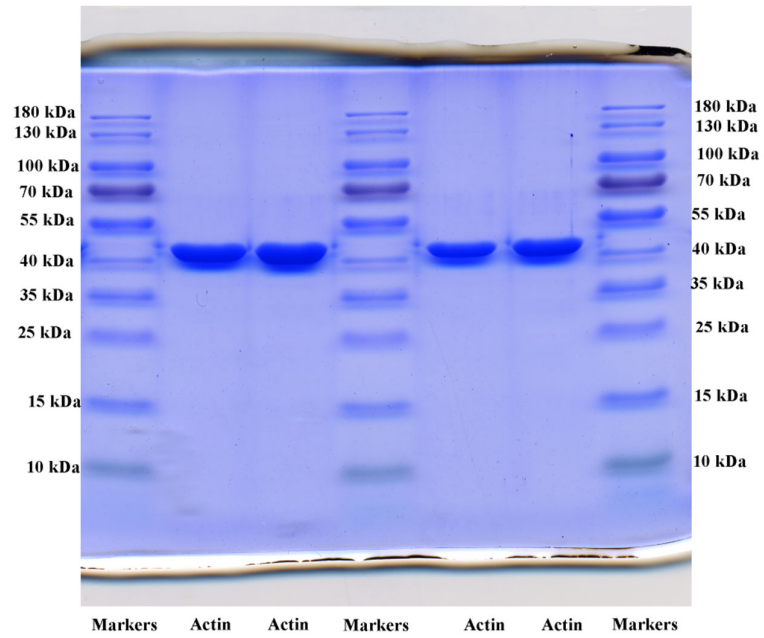

**Supplementary Fig. S2.** SDS-PAGE of purified actin and the protein markers of molecular weights within the range of 10–180 kDa were also used.
